# Supplementary material for: Prevalence, risk factors and treatments for post-COVID-19 breathlessness: a systematic review and meta-analysis
Source: PubMed Central journal article supplement — Eur Respir Rev. 2022 Nov 2;31(166):220071. doi: 10.1183/16000617.0071-2022 (PMC9724798; doi:10.1183/16000617.0071-2022), 2022-11-02
Supplement: ERR-0071-2022.SUPPLEMENT.pdf [file ERR-0071-2022.SUPPLEMENT.pdf]

## Supplementary materials

Supplementary Methods.

Supplementary Table 1. Risk of bias assessments of 104 papers for meta-analysis.

Supplementary Figure 1. Funnel plots for meta-analyses of studies using no scale (A), MRC/mMRC dyspnoea scale (B) and other scales (C).

Supplementary Table 2. Sensitivity analyses for studies not using scales for breathlessness measurement.

Supplementary Table 3. Influential analysis by removing each study from the meta-analysis.

Supplementary Table 4. Characteristics of 46 papers qualitatively synthesised for risk factors or mechanisms of post-COVID breathlessness.

Supplementary Table 5. Characteristics of 10 papers qualitatively synthesised for interventions or therapies of post-COVID breathlessness.

Supplementary References.

## Supplementary Methods.

Search strategies:

PubMed:

- 1: "COVID-19" OR "COVID 19" [MeSH Terms] OR COVID-2019 OR SARS-CoV-2 OR coronavirus OR 2019-nCoV OR 2019-SARS-CoV-2
- 2: survivor\* OR recover\* OR persistent OR follow up OR discharge\* OR "long term" OR sequela\* OR long Covid
- 3: breathless\* OR dyspnoea OR dyspnea OR difficult\* breath\* OR short\* breath\*
- 4: #1 AND #2 AND #3 Filters: from 2020 – 2021

Embase:

- 1: exp coronavirus disease 2019/
- 2: (survivor\* or recover\* or persistent or follow up or discharge\* or long term or sequela\* or long Covid).tw.
- 3: (breathless\* or dyspnoea or dyspnea or difficult\* breath\* or short\* breath\*).tw.
- 4: 1 and 2 and 3
- 5: limit 4 to (human and yr="2020 - 2021")

Two authors (B.Z. and Q.H.) independently screened the papers and performed data extraction and quality assessment. Any discrepancies were resolved following review of the corresponding papers by both authors.

**Supplementary Table 1. Risk of bias assessments of 104 papers for meta-analysis.**

| <b>First author</b> | <b>1. Sample frame appropriate to address the target population?</b> | <b>2. Were study participants sampled in an appropriate way?</b> | <b>3. Was the sample size adequate?</b> | <b>4. Were the study subjects and the setting described in detail?</b> | <b>5. Was the data analysis conducted with sufficient coverage of the identified sample?</b> | <b>6. Were valid methods used for the identification of the condition?</b> | <b>7. Was the condition measured in a standard, reliable way for all participants?</b> | <b>8. Was there appropriate statistical analysis?</b> | <b>9. Was the response rate adequate, and if not, was the low response rate managed appropriately?</b> | <b>Overall quality rating</b> |
|---------------------|----------------------------------------------------------------------|------------------------------------------------------------------|-----------------------------------------|------------------------------------------------------------------------|----------------------------------------------------------------------------------------------|----------------------------------------------------------------------------|----------------------------------------------------------------------------------------|-------------------------------------------------------|--------------------------------------------------------------------------------------------------------|-------------------------------|
| Abdelrahman, M. M.  | No                                                                   | No                                                               | No                                      | Yes                                                                    | Unclear                                                                                      | No                                                                         | No                                                                                     | No                                                    | Yes                                                                                                    | Low                           |
| Anaya, J. M.        | No                                                                   | No                                                               | No                                      | Yes                                                                    | Unclear                                                                                      | No                                                                         | Yes                                                                                    | Yes                                                   | Unclear                                                                                                | Low                           |
| Aparisi, Á.         | No                                                                   | No                                                               | No                                      | Yes                                                                    | Unclear                                                                                      | Yes                                                                        | Yes                                                                                    | Yes                                                   | Unclear                                                                                                | Moderate                      |
| Ares-Blanco, S.     | No                                                                   | Yes                                                              | No                                      | Yes                                                                    | Unclear                                                                                      | No                                                                         | Yes                                                                                    | Yes                                                   | Yes                                                                                                    | Moderate                      |
| Armange, L.         | No                                                                   | No                                                               | No                                      | Yes                                                                    | Unclear                                                                                      | No                                                                         | No                                                                                     | No                                                    | Yes                                                                                                    | Low                           |
| Arnold, D. T.       | No                                                                   | No                                                               | No                                      | Yes                                                                    | Unclear                                                                                      | No                                                                         | Yes                                                                                    | No                                                    | Yes                                                                                                    | Low                           |
| Asadi-Pooya, A. A.  | No                                                                   | Yes                                                              | No                                      | Yes                                                                    | Unclear                                                                                      | No                                                                         | Yes                                                                                    | Yes                                                   | No                                                                                                     | Moderate                      |
| Augustin, M.        | No                                                                   | No                                                               | Yes                                     | Yes                                                                    | Unclear                                                                                      | No                                                                         | Yes                                                                                    | Yes                                                   | No                                                                                                     | Moderate                      |
| Aul, D. R.          | No                                                                   | Yes                                                              | Yes                                     | Yes                                                                    | Unclear                                                                                      | No                                                                         | Yes                                                                                    | Yes                                                   | Yes                                                                                                    | High                          |
| Aydin, S.           | No                                                                   | No                                                               | No                                      | No                                                                     | Unclear                                                                                      | No                                                                         | No                                                                                     | Yes                                                   | Unclear                                                                                                | Low                           |
| Baldini, M.         | No                                                                   | Yes                                                              | No                                      | Yes                                                                    | Unclear                                                                                      | No                                                                         | Yes                                                                                    | No                                                    | Unclear                                                                                                | Low                           |
| Bell, M. L.         | Yes                                                                  | Yes                                                              | Yes                                     | Yes                                                                    | Unclear                                                                                      | No                                                                         | Yes                                                                                    | Yes                                                   | Yes                                                                                                    | High                          |
| Blomberg, B.        | Yes                                                                  | Yes                                                              | Yes                                     | Yes                                                                    | Unclear                                                                                      | No                                                                         | Yes                                                                                    | Yes                                                   | Yes                                                                                                    | High                          |
| Boari, G. E. M.     | No                                                                   | No                                                               | No                                      | No                                                                     | Unclear                                                                                      | No                                                                         | Yes                                                                                    | Yes                                                   | No                                                                                                     | Low                           |

| <b>First author</b>    | <b>1. Sample frame appropriate to address the target population?</b> | <b>2. Were study participants sampled in an appropriate way?</b> | <b>3. Was the sample size adequate?</b> | <b>4. Were the study subjects and the setting described in detail?</b> | <b>5. Was the data analysis conducted with sufficient coverage of the identified sample?</b> | <b>6. Were valid methods used for the identification of the condition?</b> | <b>7. Was the condition measured in a standard, reliable way for all participants?</b> | <b>8. Was there appropriate statistical analysis?</b> | <b>9. Was the response rate adequate, and if not, was the low response rate managed appropriately?</b> | <b>Overall quality rating</b> |
|------------------------|----------------------------------------------------------------------|------------------------------------------------------------------|-----------------------------------------|------------------------------------------------------------------------|----------------------------------------------------------------------------------------------|----------------------------------------------------------------------------|----------------------------------------------------------------------------------------|-------------------------------------------------------|--------------------------------------------------------------------------------------------------------|-------------------------------|
| Çalik Küttükcü, E.     | No                                                                   | No                                                               | No                                      | Yes                                                                    | Unclear                                                                                      | No                                                                         | Yes                                                                                    | Yes                                                   | Unclear                                                                                                | Low                           |
| Carfî, A.              | No                                                                   | Yes                                                              | No                                      | Yes                                                                    | Unclear                                                                                      | No                                                                         | Yes                                                                                    | No                                                    | Yes                                                                                                    | Moderate                      |
| Carvalho-Schneider, C. | No                                                                   | Yes                                                              | No                                      | Yes                                                                    | Unclear                                                                                      | Yes                                                                        | No                                                                                     | Yes                                                   | Yes                                                                                                    | Moderate                      |
| Cheng, D.              | No                                                                   | No                                                               | No                                      | No                                                                     | Unclear                                                                                      | Yes                                                                        | Yes                                                                                    | No                                                    | Yes                                                                                                    | Moderate                      |
| Cortés-Telles, A.      | No                                                                   | Yes                                                              | No                                      | Yes                                                                    | Unclear                                                                                      | No                                                                         | Yes                                                                                    | No                                                    | Unclear                                                                                                | Low                           |
| Damanti, S.            | No                                                                   | Yes                                                              | No                                      | Yes                                                                    | Unclear                                                                                      | Yes                                                                        | Yes                                                                                    | Yes                                                   | Yes                                                                                                    | Moderate                      |
| Dankowski, R.          | No                                                                   | Yes                                                              | No                                      | Yes                                                                    | Unclear                                                                                      | No                                                                         | Yes                                                                                    | No                                                    | Unclear                                                                                                | Low                           |
| Darcis, G.             | No                                                                   | Yes                                                              | No                                      | No                                                                     | Unclear                                                                                      | No                                                                         | Yes                                                                                    | Yes                                                   | Unclear                                                                                                | Low                           |
| Daynes, E.             | No                                                                   | No                                                               | No                                      | Yes                                                                    | Unclear                                                                                      | Yes                                                                        | No                                                                                     | No                                                    | Unclear                                                                                                | Low                           |
| D'Cruz, R. F.          | No                                                                   | Yes                                                              | No                                      | Yes                                                                    | Unclear                                                                                      | Yes                                                                        | Yes                                                                                    | Yes                                                   | Yes                                                                                                    | High                          |
| de Graaf, M. A.        | No                                                                   | No                                                               | No                                      | Yes                                                                    | Unclear                                                                                      | Yes                                                                        | Yes                                                                                    | Yes                                                   | No                                                                                                     | Moderate                      |
| Diaz-Fuentes, G.       | No                                                                   | Yes                                                              | No                                      | Yes                                                                    | Unclear                                                                                      | No                                                                         | Yes                                                                                    | No                                                    | Unclear                                                                                                | Low                           |
| Dreyer, N.             | Yes                                                                  | No                                                               | Yes                                     | Yes                                                                    | Unclear                                                                                      | No                                                                         | No                                                                                     | Yes                                                   | NA                                                                                                     | Moderate                      |
| Erol, N.               | No                                                                   | Yes                                                              | No                                      | Yes                                                                    | Unclear                                                                                      | No                                                                         | Yes                                                                                    | No                                                    | Unclear                                                                                                | Low                           |
| Evans, R. A.           | Yes                                                                  | Yes                                                              | Yes                                     | Yes                                                                    | Unclear                                                                                      | No                                                                         | Yes                                                                                    | Yes                                                   | Unclear                                                                                                | High                          |

| <b>First author</b>        | <b>1. Sample frame appropriate to address the target population?</b> | <b>2. Were study participants sampled in an appropriate way?</b> | <b>3. Was the sample size adequate?</b> | <b>4. Were the study subjects and the setting described in detail?</b> | <b>5. Was the data analysis conducted with sufficient coverage of the identified sample?</b> | <b>6. Were valid methods used for the identification of the condition?</b> | <b>7. Was the condition measured in a standard, reliable way for all participants?</b> | <b>8. Was there appropriate statistical analysis?</b> | <b>9. Was the response rate adequate, and if not, was the low response rate managed appropriately?</b> | <b>Overall quality rating</b> |
|----------------------------|----------------------------------------------------------------------|------------------------------------------------------------------|-----------------------------------------|------------------------------------------------------------------------|----------------------------------------------------------------------------------------------|----------------------------------------------------------------------------|----------------------------------------------------------------------------------------|-------------------------------------------------------|--------------------------------------------------------------------------------------------------------|-------------------------------|
| Faverio, P.                | Yes                                                                  | No                                                               | Yes                                     | Yes                                                                    | Unclear                                                                                      | Yes                                                                        | Yes                                                                                    | Yes                                                   | Yes                                                                                                    | High                          |
| Fernández-de-Las-Peñas, C. | No                                                                   | Yes                                                              | Yes                                     | Yes                                                                    | Unclear                                                                                      | No                                                                         | Yes                                                                                    | Yes                                                   | Yes                                                                                                    | Moderate                      |
| Fortini, A.                | No                                                                   | Yes                                                              | No                                      | Yes                                                                    | Unclear                                                                                      | No                                                                         | Yes                                                                                    | Yes                                                   | No                                                                                                     | Moderate                      |
| Froidure, A.               | No                                                                   | No                                                               | No                                      | Yes                                                                    | Unclear                                                                                      | Yes                                                                        | Yes                                                                                    | Yes                                                   | Yes                                                                                                    | Moderate                      |
| Gaber, T. A. K.            | No                                                                   | Yes                                                              | No                                      | No                                                                     | Unclear                                                                                      | No                                                                         | No                                                                                     | No                                                    | No                                                                                                     | Low                           |
| Galván-Tejada, C. E.       | No                                                                   | Unclear                                                          | No                                      | Yes                                                                    | Unclear                                                                                      | No                                                                         | Unclear                                                                                | Yes                                                   | Unclear                                                                                                | Low                           |
| Gamberini, L.              | Yes                                                                  | Yes                                                              | No                                      | Yes                                                                    | Unclear                                                                                      | Yes                                                                        | Yes                                                                                    | Yes                                                   | Yes                                                                                                    | High                          |
| Garrigues, E.              | No                                                                   | Yes                                                              | No                                      | Yes                                                                    | Unclear                                                                                      | Yes                                                                        | No                                                                                     | Yes                                                   | Yes                                                                                                    | Moderate                      |
| Gautam, N.                 | No                                                                   | Unclear                                                          | No                                      | Yes                                                                    | Unclear                                                                                      | Yes                                                                        | Yes                                                                                    | Yes                                                   | Yes                                                                                                    | Moderate                      |
| Ghosn, J.                  | Yes                                                                  | Yes                                                              | Yes                                     | Yes                                                                    | Unclear                                                                                      | No                                                                         | Yes                                                                                    | No                                                    | No                                                                                                     | Moderate                      |
| González, J.               | No                                                                   | No                                                               | No                                      | Yes                                                                    | Unclear                                                                                      | Yes                                                                        | Yes                                                                                    | Yes                                                   | Yes                                                                                                    | Moderate                      |
| Halpin, S. J.              | No                                                                   | Yes                                                              | No                                      | Yes                                                                    | Unclear                                                                                      | Yes                                                                        | Yes                                                                                    | No                                                    | No                                                                                                     | Moderate                      |
| Horwitz, L. I.             | No                                                                   | Yes                                                              | No                                      | Yes                                                                    | Unclear                                                                                      | Yes                                                                        | No                                                                                     | Yes                                                   | No                                                                                                     | Moderate                      |
| Huang, C.                  | No                                                                   | Yes                                                              | Yes                                     | Yes                                                                    | Unclear                                                                                      | Yes                                                                        | Yes                                                                                    | Yes                                                   | Yes                                                                                                    | High                          |
| Huang, L.                  | No                                                                   | Yes                                                              | Yes                                     | Yes                                                                    | Unclear                                                                                      | Yes                                                                        | Yes                                                                                    | Yes                                                   | Yes                                                                                                    | High                          |

| <b>First author</b>  | <b>1. Sample frame appropriate to address the target population?</b> | <b>2. Were study participants sampled in an appropriate way?</b> | <b>3. Was the sample size adequate?</b> | <b>4. Were the study subjects and the setting described in detail?</b> | <b>5. Was the data analysis conducted with sufficient coverage of the identified sample?</b> | <b>6. Were valid methods used for the identification of the condition?</b> | <b>7. Was the condition measured in a standard, reliable way for all participants?</b> | <b>8. Was there appropriate statistical analysis?</b> | <b>9. Was the response rate adequate, and if not, was the low response rate managed appropriately?</b> | <b>Overall quality rating</b> |
|----------------------|----------------------------------------------------------------------|------------------------------------------------------------------|-----------------------------------------|------------------------------------------------------------------------|----------------------------------------------------------------------------------------------|----------------------------------------------------------------------------|----------------------------------------------------------------------------------------|-------------------------------------------------------|--------------------------------------------------------------------------------------------------------|-------------------------------|
| Huang, Y.            | No                                                                   | Yes                                                              | Yes                                     | No                                                                     | Unclear                                                                                      | No                                                                         | No                                                                                     | No                                                    | NA                                                                                                     | Low                           |
| Italia, L.           | No                                                                   | No                                                               | Yes                                     | Yes                                                                    | Unclear                                                                                      | Yes                                                                        | Yes                                                                                    | Yes                                                   | Yes                                                                                                    | High                          |
| Jacobs, L. G.        | No                                                                   | Yes                                                              | No                                      | Yes                                                                    | Unclear                                                                                      | No                                                                         | No                                                                                     | Yes                                                   | No                                                                                                     | Low                           |
| Karaarslan, F.       | No                                                                   | Yes                                                              | Yes                                     | Yes                                                                    | Unclear                                                                                      | Yes                                                                        | No                                                                                     | Yes                                                   | Unclear                                                                                                | Moderate                      |
| Klein, H.            | No                                                                   | No                                                               | No                                      | Yes                                                                    | Unclear                                                                                      | No                                                                         | No                                                                                     | Yes                                                   | Yes                                                                                                    | Low                           |
| Landi, F.            | No                                                                   | Yes                                                              | No                                      | Yes                                                                    | Unclear                                                                                      | No                                                                         | Yes                                                                                    | Yes                                                   | Yes                                                                                                    | Moderate                      |
| Lerum, T. V.         | Yes                                                                  | No                                                               | No                                      | Yes                                                                    | Unclear                                                                                      | Yes                                                                        | Yes                                                                                    | Yes                                                   | Unclear                                                                                                | Moderate                      |
| Liang, L.            | No                                                                   | Yes                                                              | No                                      | Yes                                                                    | Unclear                                                                                      | Yes                                                                        | Yes                                                                                    | Yes                                                   | No                                                                                                     | Moderate                      |
| Lindahl, A.          | No                                                                   | Yes                                                              | No                                      | Yes                                                                    | Unclear                                                                                      | Yes                                                                        | No                                                                                     | Yes                                                   | No                                                                                                     | Moderate                      |
| Lund, L. C.          | Yes                                                                  | Yes                                                              | Yes                                     | Yes                                                                    | Unclear                                                                                      | Yes                                                                        | No                                                                                     | Yes                                                   | NA                                                                                                     | High                          |
| Maestre-Muñiz, M. M. | No                                                                   | Yes                                                              | Yes                                     | Yes                                                                    | Unclear                                                                                      | Yes                                                                        | No                                                                                     | Yes                                                   | Yes                                                                                                    | High                          |
| Mahmud, R.           | No                                                                   | No                                                               | Yes                                     | Yes                                                                    | Unclear                                                                                      | No                                                                         | No                                                                                     | Yes                                                   | Yes                                                                                                    | Moderate                      |
| Mallia, P.           | No                                                                   | Yes                                                              | Yes                                     | Yes                                                                    | Unclear                                                                                      | Yes                                                                        | Yes                                                                                    | Yes                                                   | Unclear                                                                                                | High                          |
| Mandal, S.           | No                                                                   | Yes                                                              | Yes                                     | Yes                                                                    | Unclear                                                                                      | No                                                                         | No                                                                                     | Yes                                                   | Yes                                                                                                    | Moderate                      |
| Mechi, A.            | No                                                                   | No                                                               | No                                      | No                                                                     | Unclear                                                                                      | No                                                                         | Yes                                                                                    | Yes                                                   | Unclear                                                                                                | Low                           |

| <b>First author</b> | <b>1. Sample frame appropriate to address the target population?</b> | <b>2. Were study participants sampled in an appropriate way?</b> | <b>3. Was the sample size adequate?</b> | <b>4. Were the study subjects and the setting described in detail?</b> | <b>5. Was the data analysis conducted with sufficient coverage of the identified sample?</b> | <b>6. Were valid methods used for the identification of the condition?</b> | <b>7. Was the condition measured in a standard, reliable way for all participants?</b> | <b>8. Was there appropriate statistical analysis?</b> | <b>9. Was the response rate adequate, and if not, was the low response rate managed appropriately?</b> | <b>Overall quality rating</b> |
|---------------------|----------------------------------------------------------------------|------------------------------------------------------------------|-----------------------------------------|------------------------------------------------------------------------|----------------------------------------------------------------------------------------------|----------------------------------------------------------------------------|----------------------------------------------------------------------------------------|-------------------------------------------------------|--------------------------------------------------------------------------------------------------------|-------------------------------|
| Meije, Y.           | No                                                                   | Yes                                                              | No                                      | Yes                                                                    | Unclear                                                                                      | No                                                                         | Yes                                                                                    | Yes                                                   | Yes                                                                                                    | Moderate                      |
| Menges, D.          | Yes                                                                  | Yes                                                              | Yes                                     | Yes                                                                    | Unclear                                                                                      | Yes                                                                        | No                                                                                     | Yes                                                   | No                                                                                                     | High                          |
| Moradian, S. T.     | No                                                                   | No                                                               | No                                      | Yes                                                                    | Unclear                                                                                      | No                                                                         | No                                                                                     | Yes                                                   | Yes                                                                                                    | Low                           |
| Morin, L.           | No                                                                   | Yes                                                              | Yes                                     | Yes                                                                    | Unclear                                                                                      | No                                                                         | No                                                                                     | Yes                                                   | Yes                                                                                                    | Moderate                      |
| Motiejunaite, J.    | No                                                                   | Yes                                                              | No                                      | No                                                                     | Unclear                                                                                      | No                                                                         | Yes                                                                                    | Yes                                                   | Unclear                                                                                                | Low                           |
| Mumoli, N.          | No                                                                   | No                                                               | No                                      | Yes                                                                    | Unclear                                                                                      | No                                                                         | Yes                                                                                    | Yes                                                   | Unclear                                                                                                | Low                           |
| Munblit, D.         | Yes                                                                  | Yes                                                              | Yes                                     | Yes                                                                    | Unclear                                                                                      | No                                                                         | Yes                                                                                    | Yes                                                   | Yes                                                                                                    | High                          |
| Naik, S.            | No                                                                   | No                                                               | Yes                                     | Yes                                                                    | Unclear                                                                                      | No                                                                         | No                                                                                     | Yes                                                   | No                                                                                                     | Low                           |
| Nehme, M.           | No                                                                   | Yes                                                              | Yes                                     | Yes                                                                    | Unclear                                                                                      | Yes                                                                        | No                                                                                     | Yes                                                   | Yes                                                                                                    | High                          |
| O'Keefe, J. B.      | No                                                                   | Yes                                                              | No                                      | Yes                                                                    | Unclear                                                                                      | No                                                                         | No                                                                                     | Yes                                                   | No                                                                                                     | Low                           |
| O'Sullivan, O.      | No                                                                   | Yes                                                              | No                                      | No                                                                     | Unclear                                                                                      | No                                                                         | Yes                                                                                    | Yes                                                   | Unclear                                                                                                | Low                           |
| Peluso, M. J.       | No                                                                   | No                                                               | No                                      | Yes                                                                    | Unclear                                                                                      | No                                                                         | Yes                                                                                    | No                                                    | Unclear                                                                                                | Low                           |
| Qin, W.             | No                                                                   | Yes                                                              | Yes                                     | Yes                                                                    | Unclear                                                                                      | No                                                                         | Yes                                                                                    | Yes                                                   | Yes                                                                                                    | High                          |
| Raman, B.           | No                                                                   | Yes                                                              | No                                      | Yes                                                                    | Unclear                                                                                      | Yes                                                                        | Yes                                                                                    | Yes                                                   | Unclear                                                                                                | Moderate                      |
| Righi, E.           | No                                                                   | Yes                                                              | Yes                                     | Yes                                                                    | Unclear                                                                                      | No                                                                         | No                                                                                     | Yes                                                   | Yes                                                                                                    | Moderate                      |
| Riou, M.            | No                                                                   | Yes                                                              | No                                      | No                                                                     | Unclear                                                                                      | No                                                                         | Yes                                                                                    | Yes                                                   | Unclear                                                                                                | Low                           |

| <b>First author</b> | <b>1. Sample frame appropriate to address the target population?</b> | <b>2. Were study participants sampled in an appropriate way?</b> | <b>3. Was the sample size adequate?</b> | <b>4. Were the study subjects and the setting described in detail?</b> | <b>5. Was the data analysis conducted with sufficient coverage of the identified sample?</b> | <b>6. Were valid methods used for the identification of the condition?</b> | <b>7. Was the condition measured in a standard, reliable way for all participants?</b> | <b>8. Was there appropriate statistical analysis?</b> | <b>9. Was the response rate adequate, and if not, was the low response rate managed appropriately?</b> | <b>Overall quality rating</b> |
|---------------------|----------------------------------------------------------------------|------------------------------------------------------------------|-----------------------------------------|------------------------------------------------------------------------|----------------------------------------------------------------------------------------------|----------------------------------------------------------------------------|----------------------------------------------------------------------------------------|-------------------------------------------------------|--------------------------------------------------------------------------------------------------------|-------------------------------|
| Sathyamurthy, P.    | No                                                                   | Yes                                                              | No                                      | Yes                                                                    | Unclear                                                                                      | No                                                                         | Yes                                                                                    | Yes                                                   | Yes                                                                                                    | Moderate                      |
| Seeßle, J.          | No                                                                   | Yes                                                              | No                                      | Yes                                                                    | Unclear                                                                                      | No                                                                         | Yes                                                                                    | Yes                                                   | Unclear                                                                                                | Moderate                      |
| Shah, A. S.         | Yes                                                                  | No                                                               | No                                      | Yes                                                                    | Unclear                                                                                      | Yes                                                                        | Yes                                                                                    | Yes                                                   | Yes                                                                                                    | Moderate                      |
| Shang, Y. F.        | No                                                                   | No                                                               | Yes                                     | No                                                                     | Unclear                                                                                      | No                                                                         | No                                                                                     | Yes                                                   | Yes                                                                                                    | Low                           |
| Shendy, W.          | No                                                                   | Yes                                                              | No                                      | Yes                                                                    | Unclear                                                                                      | Yes                                                                        | Yes                                                                                    | No                                                    | Unclear                                                                                                | Moderate                      |
| Shoucri, S. M.      | No                                                                   | Yes                                                              | Yes                                     | Yes                                                                    | Unclear                                                                                      | No                                                                         | No                                                                                     | Yes                                                   | NA                                                                                                     | Moderate                      |
| Sigfrid, L.         | Yes                                                                  | No                                                               | Yes                                     | Yes                                                                    | Unclear                                                                                      | Yes                                                                        | No                                                                                     | Yes                                                   | No                                                                                                     | Moderate                      |
| Skjorten, I.        | Yes                                                                  | No                                                               | No                                      | Yes                                                                    | Unclear                                                                                      | Yes                                                                        | Yes                                                                                    | Yes                                                   | Unclear                                                                                                | Moderate                      |
| Sonnweber, T.       | No                                                                   | Yes                                                              | No                                      | Yes                                                                    | Unclear                                                                                      | Yes                                                                        | Yes                                                                                    | Yes                                                   | Yes                                                                                                    | High                          |
| Stavem, K.          | No                                                                   | Yes                                                              | Yes                                     | Yes                                                                    | Unclear                                                                                      | No                                                                         | No                                                                                     | Yes                                                   | No                                                                                                     | Moderate                      |
| Suárez-Robles, M.   | No                                                                   | Yes                                                              | No                                      | No                                                                     | Unclear                                                                                      | No                                                                         | No                                                                                     | Yes                                                   | Unclear                                                                                                | Low                           |
| Sultana, S.         | No                                                                   | Yes                                                              | Yes                                     | Yes                                                                    | Unclear                                                                                      | No                                                                         | Yes                                                                                    | Yes                                                   | Yes                                                                                                    | Moderate                      |
| Sun, L. L.          | No                                                                   | Yes                                                              | Yes                                     | Yes                                                                    | Unclear                                                                                      | Yes                                                                        | No                                                                                     | Yes                                                   | Yes                                                                                                    | High                          |
| Szekely, Y.         | No                                                                   | Yes                                                              | No                                      | Yes                                                                    | Unclear                                                                                      | No                                                                         | Yes                                                                                    | Yes                                                   | No                                                                                                     | Moderate                      |
| Tawfik, H. M.       | No                                                                   | No                                                               | No                                      | Yes                                                                    | Unclear                                                                                      | No                                                                         | No                                                                                     | Yes                                                   | Unclear                                                                                                | Low                           |
| Taylor, R. R.       | No                                                                   | Yes                                                              | Yes                                     | No                                                                     | Unclear                                                                                      | Yes                                                                        | No                                                                                     | Yes                                                   | Unclear                                                                                                | Moderate                      |



| <b>First author</b> | <b>1. Sample frame appropriate to address the target population?</b> | <b>2. Were study participants sampled in an appropriate way?</b> | <b>3. Was the sample size adequate?</b> | <b>4. Were the study subjects and the setting described in detail?</b> | <b>5. Was the data analysis conducted with sufficient coverage of the identified sample?</b> | <b>6. Were valid methods used for the identification of the condition?</b> | <b>7. Was the condition measured in a standard, reliable way for all participants?</b> | <b>8. Was there appropriate statistical analysis?</b> | <b>9. Was the response rate adequate, and if not, was the low response rate managed appropriately?</b> | <b>Overall quality rating</b> |
|---------------------|----------------------------------------------------------------------|------------------------------------------------------------------|-----------------------------------------|------------------------------------------------------------------------|----------------------------------------------------------------------------------------------|----------------------------------------------------------------------------|----------------------------------------------------------------------------------------|-------------------------------------------------------|--------------------------------------------------------------------------------------------------------|-------------------------------|
| Todt, B. C.         | No                                                                   | Yes                                                              | No                                      | Yes                                                                    | Unclear                                                                                      | Yes                                                                        | No                                                                                     | Yes                                                   | No                                                                                                     | Moderate                      |
| Tosato, M.          | No                                                                   | Yes                                                              | No                                      | Yes                                                                    | Unclear                                                                                      | No                                                                         | Yes                                                                                    | No                                                    | Yes                                                                                                    | Moderate                      |
| Varghese, J.        | No                                                                   | No                                                               | No                                      | Yes                                                                    | Unclear                                                                                      | No                                                                         | Yes                                                                                    | No                                                    | Unclear                                                                                                | Low                           |
| Venturelli, S.      | No                                                                   | Yes                                                              | Yes                                     | Yes                                                                    | Unclear                                                                                      | Yes                                                                        | Yes                                                                                    | Yes                                                   | No                                                                                                     | High                          |
| Vijayakumar, B.     | No                                                                   | No                                                               | No                                      | Yes                                                                    | Unclear                                                                                      | Yes                                                                        | Yes                                                                                    | Yes                                                   | No                                                                                                     | Moderate                      |
| Weerahandi, H.      | No                                                                   | Yes                                                              | No                                      | Yes                                                                    | Unclear                                                                                      | Yes                                                                        | No                                                                                     | Yes                                                   | No                                                                                                     | Moderate                      |
| Wu, Q.              | No                                                                   | Yes                                                              | No                                      | No                                                                     | Unclear                                                                                      | Yes                                                                        | Yes                                                                                    | Yes                                                   | No                                                                                                     | Moderate                      |
| Wu, X.              | No                                                                   | Yes                                                              | No                                      | Yes                                                                    | Unclear                                                                                      | Yes                                                                        | Yes                                                                                    | Yes                                                   | Yes                                                                                                    | High                          |
| Yin, X.             | No                                                                   | No                                                               | Yes                                     | Yes                                                                    | Unclear                                                                                      | Yes                                                                        | Yes                                                                                    | Yes                                                   | Unclear                                                                                                | Moderate                      |
| Yomogida, K.        | Yes                                                                  | Yes                                                              | Yes                                     | Yes                                                                    | Unclear                                                                                      | No                                                                         | Yes                                                                                    | Yes                                                   | No                                                                                                     | High                          |
| Zayet, S.           | No                                                                   | Yes                                                              | Yes                                     | Yes                                                                    | Unclear                                                                                      | No                                                                         | No                                                                                     | Yes                                                   | Unclear                                                                                                | Moderate                      |
| Zhang, X.           | No                                                                   | Yes                                                              | Yes                                     | Yes                                                                    | Unclear                                                                                      | No                                                                         | Yes                                                                                    | Yes                                                   | Yes                                                                                                    | High                          |
| Zhao, Y. M.         | No                                                                   | Yes                                                              | No                                      | Yes                                                                    | Unclear                                                                                      | No                                                                         | Yes                                                                                    | Yes                                                   | Yes                                                                                                    | Moderate                      |

Note: The risk of bias assessment was conducted based on the “Joanna Briggs Institute (JBI) Critical Appraisal Checklist for Studies Reporting Prevalence Data”

(<https://jbi.global/critical-appraisal-tools>) [1].

Supplementary Figure 1. Funnel plots for meta-analyses of studies with no scale (A), MRC/mMRC dyspnoea scale (B) and other scales (C).

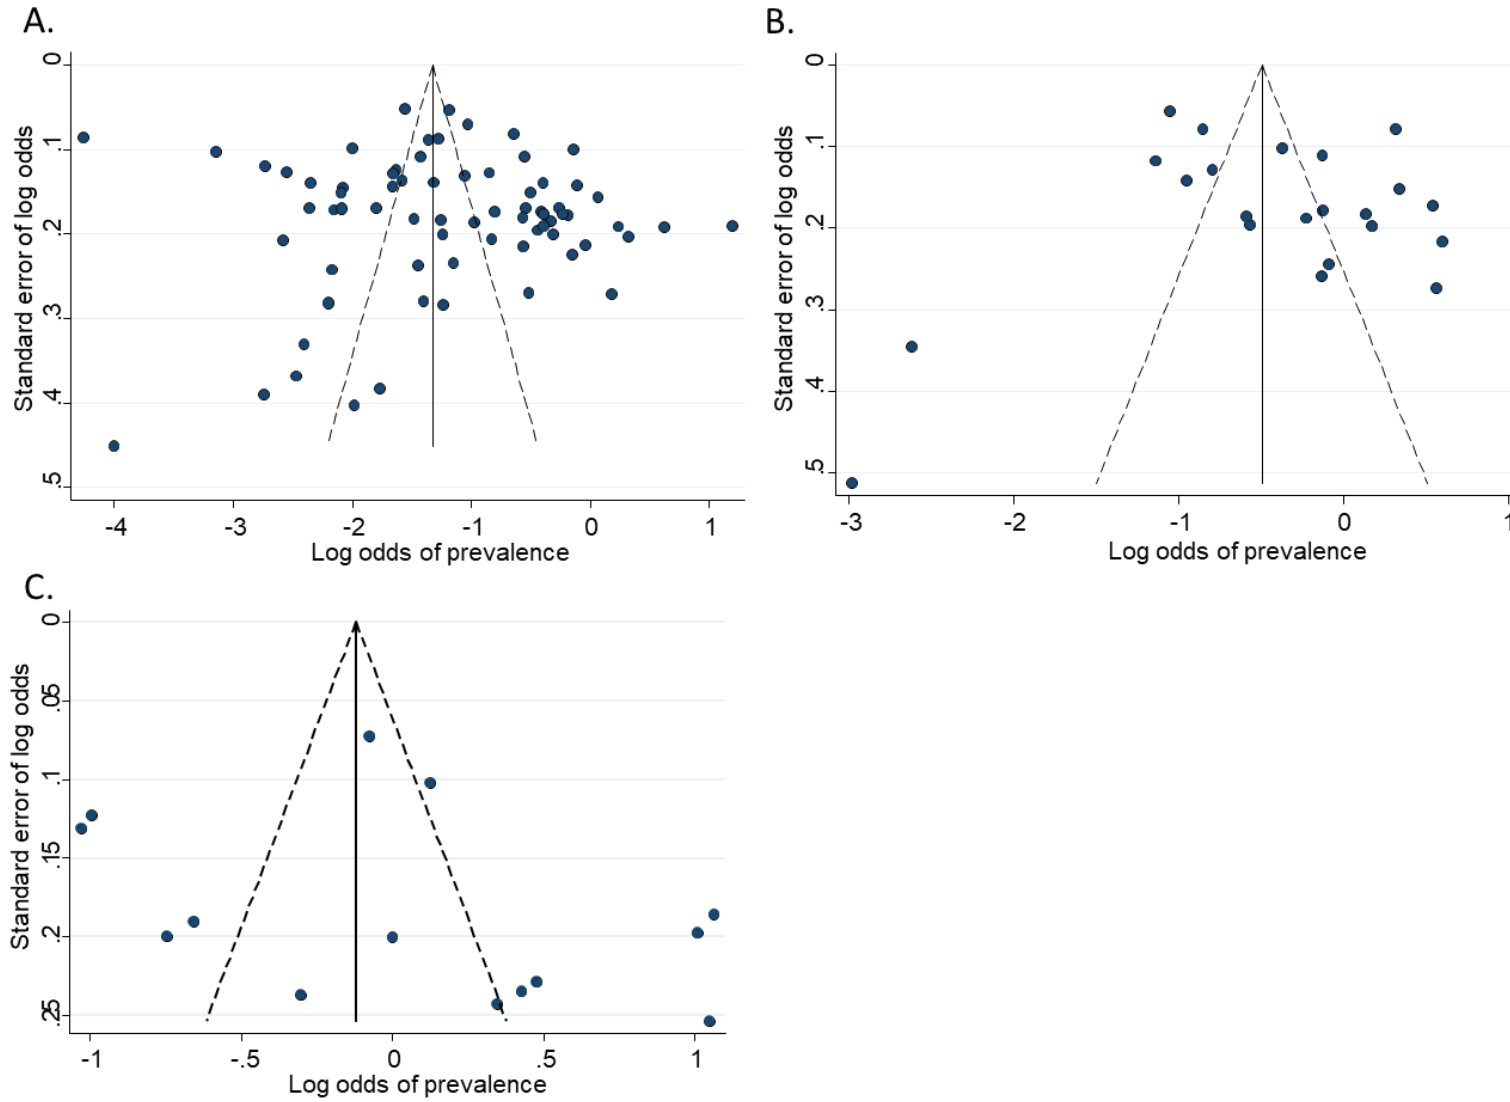

**Supplementary Table 2. Sensitivity analyses for studies not using scales for breathlessness measurement.**

| Sensitivity analyses                                                       | No. of eligible studies | Overall pooled prevalence (95% CI) | Hospitalisation |                  | Follow-up time |             |
|----------------------------------------------------------------------------|-------------------------|------------------------------------|-----------------|------------------|----------------|-------------|
|                                                                            |                         |                                    | Hospitalised    | Non-hospitalised | 1-6 months     | 7-12 months |
| Exclude studies with any children or adolescents (<18 years old)           | 63                      | 28% (25-31)                        | 29% (24-33)     | 19% (12-25)      | 29% (26-33)    | 20% (15-26) |
| Exclude studies with any follow-up data $\leq$ 28 days                     | 66                      | 27% (24-30)                        | 27% (23-31)     | 19% (14-24)      | 29% (25-33)    | 20% (15-26) |
| Exclude studies based on electronic health record data                     | 68                      | 27% (24-30)                        | 28% (24-32)     | 19% (13-25)      | 28% (25-32)    | 20% (15-26) |
| Exclude studies rated as low quality                                       | 40                      | 22% (19-25)                        | 23% (19-27)     | 13% (6-20)       | 25% (21-29)    | 19% (13-25) |
| Use prevalence estimates after logit transformation                        | 71                      | 23% (19-27)                        | 24% (19-29)     | 14% (7-27)       | 25% (22-30)    | 18% (13-25) |
| Use prevalence estimates after Freeman-Tukey double arcsine transformation | 71                      | 25% (21-29)                        | 25% (20-31)     | 16% (7-28)       | 27% (23-31)    | 19% (13-26) |

**Supplementary Table 3. Influential analysis by removing each study from the meta-analysis.**

|                                                                 | <b>No scale</b> | <b>MRC/mMRC dyspnoea scale</b> | <b>Other scales</b> |
|-----------------------------------------------------------------|-----------------|--------------------------------|---------------------|
| No. of eligible studies                                         | 71              | 22                             | 14                  |
| Range of overall pooled prevalence of post-COVID breathlessness | 25%-27%         | 40%-43%                        | 49%-53%             |

**Supplementary Table 4. Characteristics of 46 papers qualitatively synthesised for risk factors or mechanisms of post-COVID breathlessness.**

| First author          | Sample size | Country     | Mean/median age, year | Male proportion | Exposure/measurement                                                                                                                                                                                     | Scale for breathlessness                       | Hospitalisation | Follow-up method | Follow-up period, month | Main results                                                                                                                                                                                                                                                                                                                                                              |
|-----------------------|-------------|-------------|-----------------------|-----------------|----------------------------------------------------------------------------------------------------------------------------------------------------------------------------------------------------------|------------------------------------------------|-----------------|------------------|-------------------------|---------------------------------------------------------------------------------------------------------------------------------------------------------------------------------------------------------------------------------------------------------------------------------------------------------------------------------------------------------------------------|
| Anaya, J. M. [2]      | 100         | Colombia    | 49                    | 0.47            | COVID-19 severity                                                                                                                                                                                        |                                                | mixed           | visit            | 7-12                    | No significant association between COVID-19 severity and persistent breathlessness.                                                                                                                                                                                                                                                                                       |
| Arnold, D. T. [3]     | 67          | UK          | 55                    | 0.63            | KL-6 level                                                                                                                                                                                               |                                                | hosp            | visit            | 1-6                     | No significant difference in the 12-week KL-6 level and presence of subjective breathlessness.                                                                                                                                                                                                                                                                            |
| Aparisi, Á. [4]       | 70          | Spain       | 55                    | 0.36            | sex, age, obesity, comorbidities, transthoracic echocardiogram, pulmonary function test, cardiopulmonary exercise testing, predicted peak VO2 consumption, total distance in the six-minute walking test | NYHA functional class $\geq 2$                 | mixed           | visit            | 1-6                     | Patients with dyspnoea had higher proportion of females (p=0.065), significant decline in predicted peak VO2 consumption, total distance in the six-minute walking test and abnormalities in cardiopulmonary exercise testing. No significant differences in age, prevalence of cardiovascular risk factors and transthoracic echocardiogram and pulmonary function test. |
| Aydin, S. [5]         | 116         | Turkey      | 49                    | 0.48            | CT severity index, CRP                                                                                                                                                                                   |                                                | hosp            | phone            | 1-6                     | Persistent shortness of breath was significantly correlated with high CT severity index and CRP values.                                                                                                                                                                                                                                                                   |
| Baldini, M. [6]       | 55          | Argentina   | 55                    | 0.73            | gas transfer                                                                                                                                                                                             |                                                | hosp            | visit            | 1-6                     | Patients with dyspnoea had DLCO and KCO values lower than those who did not have this symptom.                                                                                                                                                                                                                                                                            |
| Cortés-Telles, A. [7] | 186         | Mexico      | 47                    | 0.61            | spirometry, gas transfer, six-minute walk distance, end-exercise oxygen saturation                                                                                                                       |                                                | mixed           | visit            | 1-6                     | Patients with persistent dyspnoea had significantly lower FVC, FEV1, DLCO, 6-minute walk distance, end-exercise oxygen saturation.                                                                                                                                                                                                                                        |
| D'Cruz, R. F. [8]     | 115         | UK          | 59                    | 0.62            | age, sex, obesity, smoking, comorbidities, hospital length of stay, ICU, CT, exertional desaturation, mood symptoms, anxiety, post-traumatic stress disorder                                             | mMRC increase, numerical rating scale $\geq 4$ | hosp            | visit            | 1-6                     | Pre-morbid obstructive lung disease, mood symptoms, anxiety and post-traumatic stress disorder was significantly associated with persistent breathlessness, but not for age, sex, obesity, smoking, other/overall comorbidities, hospital length of stay, ICU-admission, CT and exertional desaturation.                                                                  |
| de Graaf, M. A. [9]   | 81          | Netherlands | 61                    | 0.63            | spirometry, gas transfer, echocardiogram                                                                                                                                                                 | NYHA functional class $\geq 2$                 | hosp            | visit            | 1-6                     | Patients with higher NYHA class had significantly lower DLCOc values, but no significant difference in spirometry or echocardiogram.                                                                                                                                                                                                                                      |
| Dreyer, N. [10]       | 977         | USA         | 42                    | 0.12            | use of medications for autoimmune disease                                                                                                                                                                |                                                | mixed           | online           | 1-6                     | Around day 30 a higher proportion of participants reporting use of medications for                                                                                                                                                                                                                                                                                        |

| First author                    | Sample size | Country | Mean/median age, year | Male proportion | Exposure/measurement                                                                                                       | Scale for breathlessness | Hospitalisation | Follow-up method | Follow-up period, month | Main results                                                                                                                                                                                                                                                                                                                                 |
|---------------------------------|-------------|---------|-----------------------|-----------------|----------------------------------------------------------------------------------------------------------------------------|--------------------------|-----------------|------------------|-------------------------|----------------------------------------------------------------------------------------------------------------------------------------------------------------------------------------------------------------------------------------------------------------------------------------------------------------------------------------------|
|                                 |             |         |                       |                 |                                                                                                                            |                          |                 |                  |                         | autoimmune disease remained symptomatic compared to all other participants.                                                                                                                                                                                                                                                                  |
| Faverio, P. [11]                | 283         | Italy   | 62                    | 0.73            | COVID-19 severity                                                                                                          | mMRC $\geq$ 1            | hosp            | visit            | 1-6                     | mMRC scale had no difference between severity groups.                                                                                                                                                                                                                                                                                        |
| Fernández-de-Las-Peñas, C. [12] | 1142        | Spain   | 61                    | 0.52            | sex, comorbidities, number of symptoms at hospitalisation, ICU, number of days at hospital                                 |                          | hosp            | phone            | 7-12                    | Risk factors associated with dyspnoea included female gender, number of pre-existing comorbidities, number of symptoms at hospitalisation, and number of days at hospital.                                                                                                                                                                   |
| Fernández-de-Las-Peñas, C. [13] | 435         | Spain   | 70                    | 0.62            | diabetes                                                                                                                   |                          | hosp            | phone            | 7-12                    | No differences were observed in the presence of dyspnoea on exertion between patients with or without diabetes.                                                                                                                                                                                                                              |
| Fernández-de-Las-Peñas, C. [14] | 264         | Spain   | 52                    | 0.60            | obesity                                                                                                                    |                          | hosp            | phone            | 7-12                    | No significant difference in the prevalence of dyspnoea was observed between people with and without obesity.                                                                                                                                                                                                                                |
| Fortini, A. [15]                | 59          | Italy   | 68                    | 0.53            | age, sex, comorbidities, clinical severity of COVID-19 during hospitalisation, lung ultrasound abnormalities, gas transfer |                          | hosp            | visit            | 1-6                     | Age, gender, Charlson Comorbidity Index, presence of Chronic Obstructive Pulmonary Disease, and clinical severity of COVID-19 during hospitalisation did not predict the persistence of dyspnoea. Exertional dyspnoea was significantly associated with the persistence of lung ultrasound abnormalities and diffusing capacity alterations. |
| Froidure, A. [16]               | 126         | Belgium | 60                    | 0.59            | age, sex, severity, HRCT, spirometry, gas transfer                                                                         | mMRC $\geq$ 1            | hosp            | visit            | 1-6                     | None of the factors tested (age, sex, severity, HRCT, spirometry, gas transfer) were able to explain the persistence of dyspnoea at follow-up.                                                                                                                                                                                               |
| Gamberini, L. [17]              | 178         | Italy   | 64                    | 0.73            | spirometry, gas transfer, respiratory system compliance, PaO <sub>2</sub> /FiO <sub>2</sub> , length of IMV                | mMRC $\geq$ 1            | hosp            | visit            | 7-12                    | Persistent dyspnoea was weakly but significantly correlated with both DLCO and length of IMV, but not with PaO <sub>2</sub> /FiO <sub>2</sub> or spirometry.                                                                                                                                                                                 |
| Garrigues, E. [18]              | 120         | France  | 63                    | 0.63            | ICU                                                                                                                        | mMRC $\geq$ 1, no        | hosp            | phone            | 1-6                     | No significant difference regarding persistent symptoms between ward patients versus ICU patients.                                                                                                                                                                                                                                           |
| Gautam, N. [19]                 | 144         | UK      | 57                    | 0.63            | obesity, comorbidities, abnormal chest X-ray, spirometry, severity, ICU, CRP                                               | mMRC $\geq$ 1            | hosp            | visit            | -                       | Patients with breathlessness had significantly higher rate of comorbidities, abnormal residual chest X-ray and spirometry. No significant difference                                                                                                                                                                                         |

| First author        | Sample size | Country     | Mean/median age, year | Male proportion | Exposure/measurement                                                                                         | Scale for breathlessness                            | Hospitalisation | Follow-up method | Follow-up period, month | Main results                                                                                                                                                                                                               |
|---------------------|-------------|-------------|-----------------------|-----------------|--------------------------------------------------------------------------------------------------------------|-----------------------------------------------------|-----------------|------------------|-------------------------|----------------------------------------------------------------------------------------------------------------------------------------------------------------------------------------------------------------------------|
|                     |             |             |                       |                 |                                                                                                              |                                                     |                 |                  |                         | between patients managed on hospital wards and on ITU groups, in blood markers for inflammation or organ injury, nor the state of their acute illness.                                                                     |
| Horwitz, L. I. [20] | 126         | USA         | 62                    | 0.60            | follow-up time                                                                                               | PROMIS® Dyspnea Characteristics instrument $\geq 1$ | hosp            | online/phone     | 7-12                    | A trend of decreased prevalence in 6 months vs 1 month ( $p=0.06$ ).                                                                                                                                                       |
| Huang, C. [21]      | 1615        | China       | 57                    | 0.52            | COVID-19 severity                                                                                            | mMRC $\geq 1$                                       | hosp            | visit            | 1-6                     | The risk of an mMRC score greater than 1 was significantly higher in participants with COVID-19 disease severity scale 5-6 than those with scale 3.                                                                        |
| Huang, L. [22]      | 1271        | China       | 59                    | 0.53            | follow-up time                                                                                               | mMRC $\geq 1$                                       | hosp            | visit            | 7-12                    | The proportion of patients with dyspnoea slightly increased from 26% at 6-month visit to 30% at 12-month visit ( $p=0.014$ ).                                                                                              |
| Italia, L. [23]     | 123         | Italy       | 62                    | 0.68            | myocardial injury                                                                                            | NYHA functional class $\geq 2$                      | hosp            | visit            | 1-6                     | Patients with myocardial injury were more frequently symptomatic for dyspnoea.                                                                                                                                             |
| Lerum, T. V. [24]   | 103         | Norway      | 59                    | 0.52            | age, sex, ICU                                                                                                | mMRC $\geq 1$                                       | hosp            | visit            | 1-6                     | No significant associations between ICU admission or age and dyspnoea scores. Females tend to have higher prevalence of the symptom ( $p=0.069$ ).                                                                         |
| Liang, L. [25]      | 76          | China       | 41                    | 0.28            | spirometry, gas transfer                                                                                     | 0-4 grade $\geq 1$                                  | hosp            | visit            | 1-6                     | Dyspnoea scores correlated well with pulmonary function parameters for FEV1, FVC, FEV1/FVC, TLC.                                                                                                                           |
| Lindahl, A. [26]    | 93          | Finland     | 60                    | 0.53            | sex                                                                                                          | mMRC $\geq 1$                                       | hosp            | online/printed   | 1-6                     | Women reported more frequently dyspnoea than men.                                                                                                                                                                          |
| Mechi, A. [27]      | 112         | Iraq        | 51                    | 0.66            | diabetes                                                                                                     |                                                     | mixed           | visit            | 7-12                    | Diabetes group reported persistent shortness of breath more frequently compared to non-diabetes group.                                                                                                                     |
| Meije, Y. [28]      | 294         | Spain       | 69                    | 0.57            | PaO2/FiO2 <200 during hospitalisation                                                                        |                                                     | hosp            | visit            | 1-6                     | PaO2/FiO2 <200 during hospitalisation as an independent predictor of persistent dyspnoea.                                                                                                                                  |
| Menges, D. [29]     | 384         | Switzerland | 47                    | 0.50            | age, sex, hospitalisation, BMI, comorbidities, initial symptom severity, ICU, smoking status, follow-up time | mMRC $\geq 1$                                       | mixed           | online           | 7-12                    | Significant association of dyspnoea with female sex, initial hospitalisation, higher BMI and presence of comorbidities, but not for initial symptom severity, smoking status or presence of chronic respiratory condition. |

| First author          | Sample size | Country | Mean/median age, year | Male proportion | Exposure/measurement                                                                                             | Scale for breathlessness | Hospitalisation | Follow-up method | Follow-up period, month | Main results                                                                                                                                                                                                                                                    |
|-----------------------|-------------|---------|-----------------------|-----------------|------------------------------------------------------------------------------------------------------------------|--------------------------|-----------------|------------------|-------------------------|-----------------------------------------------------------------------------------------------------------------------------------------------------------------------------------------------------------------------------------------------------------------|
| Milanese, M. [30]     | 135         | Italy   | 59                    | 0.67            | COVID-19 severity                                                                                                | mMRC $\geq$ 2            | hosp            | visit            | 1-6                     | No significant association between COVID-19 severity and persistent breathlessness.                                                                                                                                                                             |
| Motiejunaite, J. [31] | 114         | France  | 57                    | 0.67            | gas transfer                                                                                                     |                          | mixed           | visit            | 1-6                     | No significant association between DLCO and persistent breathlessness.                                                                                                                                                                                          |
| Naik, S. [32]         | 1234        | India   | 41                    | 0.69            | hospitalisation                                                                                                  |                          | mixed           | visit/phone      | 1-6                     | Hospitalised patients had significantly higher prevalence of the symptom than non-hospitalised patients.                                                                                                                                                        |
| Qin, W. [33]          | 647         | China   | 58                    | 0.44            | COVID-19 severity                                                                                                |                          | hosp            | visit            | 1-6                     | Prevalence of dyspnoea in patients with severe COVID-19 was markedly higher than that in the non-severe patients (12% vs 7%, $p=0.014$ ).                                                                                                                       |
| Raman, B. [34]        | 58          | UK      | 55                    | 0.59            | mood symptoms, anxiety, severity                                                                                 | MRC $\geq$ 2             | hosp            | visit            | 1-6                     | A moderate correlation was seen between extent of mood symptoms and anxiety and ongoing breathlessness. Hospitalised patients with more severe disease were more likely to experience persistent breathlessness.                                                |
| Riou, M. [35]         | 81          | France  | 61                    | 0.73            | COVID-19 severity                                                                                                |                          | hosp            | visit            | 1-6                     | No significant association between COVID-19 severity and persistent breathlessness.                                                                                                                                                                             |
| Seeßle, J. [36]       | 96          | Germany | 57                    | 0.49            | age, follow-up time                                                                                              |                          | mixed           | visit            | 1-6, 7-12               | Between 5 months and 12 months after symptom onset, the reported symptom frequency increased for dyspnoea. Younger patients (<60 years) reported dyspnoea significantly more often than the group of patients aged 60 years and older.                          |
| Shah, A. S. [37]      | 73          | Canada  | 65                    | 0.60            | age, sex, follow-up time, smoking status, comorbidities, spirometry, gas transfer, echocardiogram, mood symptoms | UCSD-SOBQ > 10           | hosp            | Visit            | 1-6                     | Patients with dyspnoea had greater impairments in spirometry and DLCO and mood symptoms compared to patients without dyspnoea. No significant change in median dyspnoea score over time. No difference in age, smoking status, comorbidities or echocardiogram. |
| Shang, Y. F. [38]     | 796         | China   | 62                    | 0.51            | age, sex, severity                                                                                               |                          | hosp            | phone            | 1-6                     | No association between shortness of breath and disease severity or age; females tend to have higher prevalence of the symptom ( $p=0.072$ ).                                                                                                                    |
| Sigfrid, L. [39]      | 327         | UK      | 60                    | 0.59            | age, sex, comorbidities                                                                                          | MRC increase             | hosp            | post/phone/visit | 7-12                    | No association between new or persistent breathlessness and disease severity or age.                                                                                                                                                                            |



| First author         | Sample size | Country | Mean/median age, year | Male proportion | Exposure/measurement                                                                                                                                                                                                              | Scale for breathlessness | Hospitalisation | Follow-up method | Follow-up period, month | Main results                                                                                                                                                                                                                                                                                                                  |
|----------------------|-------------|---------|-----------------------|-----------------|-----------------------------------------------------------------------------------------------------------------------------------------------------------------------------------------------------------------------------------|--------------------------|-----------------|------------------|-------------------------|-------------------------------------------------------------------------------------------------------------------------------------------------------------------------------------------------------------------------------------------------------------------------------------------------------------------------------|
|                      |             |         |                       |                 |                                                                                                                                                                                                                                   |                          |                 |                  |                         | Females had higher prevalence of breathlessness than males.                                                                                                                                                                                                                                                                   |
| Skjorten, I. [40]    | 126         | Norway  | 56                    | 0.62            | age, sex, obesity, diabetes, cardiopulmonary exercise testing, VO <sub>2</sub> peak·kg <sup>-1</sup> , ventilatory efficiency, heart rate, systolic blood pressure                                                                | mMRC ≥ 1                 | hosp            | visit            | 1-6                     | Participants reporting dyspnoea had significantly lower VO <sub>2</sub> peak·kg <sup>-1</sup> , ventilatory efficiency, heart rate, systolic blood pressure, higher BMI, but no difference in age, sex or diabetes.                                                                                                           |
| Sonnweber, T. [41]   | 133         | Austria | 57                    | 0.55            | CT, spirometry, gas transfer, follow-up time                                                                                                                                                                                      |                          | mixed           | visit            | 1-6                     | The CT severity score and lung function parameters including FVC, FEV <sub>1</sub> , TLC and DLCO demonstrated a weak but significant correlation to the severity of dyspnoea.                                                                                                                                                |
| Szekely, Y. [42]     | 71          | Israel  | 53                    | 0.66            | echocardiogram, cardiopulmonary exercise testing                                                                                                                                                                                  |                          | mixed           | visit            | 1-6                     | Patients with dyspnoea had attenuated changes in SV, HR, cardiac output, and lung tidal volume and decreased ventilatory efficiency.                                                                                                                                                                                          |
| Vijayakumar, B. [43] | 80          | UK      | 59                    | 0.66            | CT                                                                                                                                                                                                                                |                          | hosp            | visit            | 1-6                     | No difference in participant-reported breathlessness between those with and without CT abnormalities.                                                                                                                                                                                                                         |
| Wu, X. [44]          | 83          | China   | 60                    | 0.57            | follow-up time                                                                                                                                                                                                                    | mMRC ≥ 1                 | hosp            | visit            | 1-6, 7-12               | The number of patients with various levels of dyspnoea symptoms progressively and significantly reduced at 6 months, 9 months, and 12 months.                                                                                                                                                                                 |
| Yin, X. [45]         | 337         | China   | 54                    | 0.50            | CT, age, sex, follow-up time, comorbidities, smoking status, duration of hospital stays, receipt of hormone administration, receipt of immunoglobulin injections, severity, ICU admission, receipt of mechanical ventilation, CRP | 0-4 grade ≥ 1            | hosp            | visit            | 7-12                    | Age, comorbidity score, duration of hospital stays, receipt of hormone administration, receipt of immunoglobulin injections, ICU admission, receipt of mechanical ventilation, laboratory parameters, and CT findings associated with lesion volume were significantly different between survivors with and without dyspnoea. |
| Yomogida, K. [46]    | 366         | USA     | 39                    | 0.43            | ethnicity, age, sex, comorbidities                                                                                                                                                                                                |                          | mixed           | phone            | 1-6, 7-12               | Risk of experiencing dyspnoea 2 months after testing were higher in Black people than in other racial/ethnic groups.                                                                                                                                                                                                          |
| Zhang, X. [47]       | 2433        | China   | 60                    | 0.50            | age, sex, follow-up time, smoking status, oxygen therapy, mechanical ventilation, comorbidities, ICU, days at hospital                                                                                                            |                          | hosp            | phone            | 7-12                    | Age, oxygen therapy, mechanical ventilation and coexisting chronic liver diseases, but not sex, smoking or ICU admission, were risk factors for dyspnoea.                                                                                                                                                                     |

Note: “-“ refers to information unclear or not applicable. hosp = hospitalised patients; non-hosp = non-hospitalised patients; NYHA = New York Heart Association; mMRC = modified Medical Research Council Dyspnoea Scale; MRC = Medical Research Council Dyspnoea Scale; UCSD-SOBQ = University of California San Diego–Shortness of Breath Questionnaire; KL-6 = Krebs von den Lungen 6; CT = computed tomography; CRP = C-reactive protein; ICU = intensive care unit; PaO<sub>2</sub>/FiO<sub>2</sub> = ratio of arterial oxygen partial pressure to fractional inspired oxygen; IMV = invasive mechanical ventilation; BMI = body mass index.

**Supplementary Table 5. Characteristics of 10 papers qualitatively synthesised for interventions or therapies of post-COVID breathlessness.**

| First author         | RCT | Population                                                                                                   | Sample size                                                                   | Country  | Intervention                                                                                                                                                                                | Results                                                                                                                         | Mean/median age, year | Male proportion | Scale for breathlessness     | Hospitalisation | Follow-up method | Follow-up time                                                                         |
|----------------------|-----|--------------------------------------------------------------------------------------------------------------|-------------------------------------------------------------------------------|----------|---------------------------------------------------------------------------------------------------------------------------------------------------------------------------------------------|---------------------------------------------------------------------------------------------------------------------------------|-----------------------|-----------------|------------------------------|-----------------|------------------|----------------------------------------------------------------------------------------|
| Ahmed, I. [48]       | No  | post-discharge COVID-19 patients having below standard 6-min walk test and quality of life score at baseline | 20                                                                            | Pakistan | five weeks of moderate to high-intensity rehabilitation training (aerobic and breathing exercise), 3 sessions/week                                                                          | After 5 weeks of exercise training, the Borg dyspnoea score has significantly improved ( $p<0.001$ ).                           | 40                    | 0.65            | Modified Borg Dyspnoea Scale | hosp            | visit            | 23-28 days (baseline) + 5 weeks                                                        |
| Bouteleux, B. [49]   | No  | patients referred with COVID-19 sequelae                                                                     | 25                                                                            | France   | outpatient respiratory rehabilitation (aerobic exercise and strength training combined with specific controlled ventilation techniques when necessary), sessions of 1.5h three times a week | Over the course of rehabilitation, exertional dyspnoea significantly improved ( $p<0.001$ ).                                    | 47                    | 0.48            | mMRC                         | mixed           | visit            | a median of 84 [35-154] days after disease onset (baseline) + 2 months rehabilitation  |
| Cesarone, M. R. [50] | No  | subjects with post-COVID-19 lung disease                                                                     | 18 (10 with Pycnogenol® Centellicum® combination; 8 with standard management) | Italy    | the combination of Pycnogenol® (150 mg/day) and Centellicum® (3×225 mg/day), used before being diagnosed with COVID-19 and hospital admission                                               | Shortness of breath and effort dyspnoea after 4 weeks were significantly improved with the supplement combination ( $p<0.05$ ). | 57                    | 1.00            |                              | hosp            | visit            | 4 weeks after hospital exit for COVID-19                                               |
| Curci, C. [51]       | No  | post-intensive care unit COVID-19 patients referred to an Italian COVID-19 Rehabilitation Unit               | 39                                                                            | Italy    | patient-tailored inpatient rehabilitation (30 minutes/set, 2 times/day), aimed to improve gas exchanges, reduce dyspnoea, and improve muscle function                                       | Dyspnoea in ADL was significantly reduced compared to baseline.                                                                 | 72                    | 0.61            | mMRC                         | hosp            | visit            | directly after ICU discharge (baseline) + mean of 32±9 days in the Rehabilitation Unit |

| First author            | RCT | Population                                                                                       | Sample size                                    | Country | Intervention                                                                                                                                                                                                                                                                | Results                                                                                                                                                                                                                                                    | Mean/median age, year | Male proportion | Scale for breathlessness                                                                                               | Hospitalisation | Follow-up method | Follow-up time                                                                                                                    |
|-------------------------|-----|--------------------------------------------------------------------------------------------------|------------------------------------------------|---------|-----------------------------------------------------------------------------------------------------------------------------------------------------------------------------------------------------------------------------------------------------------------------------|------------------------------------------------------------------------------------------------------------------------------------------------------------------------------------------------------------------------------------------------------------|-----------------------|-----------------|------------------------------------------------------------------------------------------------------------------------|-----------------|------------------|-----------------------------------------------------------------------------------------------------------------------------------|
| Dalbosco-Salas, M. [52] | No  | post-COVID-19 adult patients who had persistent dyspnoea at post-discharge follow-up             | 115                                            | Chile   | nine weeks of Primary Care Telerehabilitation Program, consisted of 24 sessions of supervised home-based exercise training                                                                                                                                                  | Dyspnoea improved significantly after the intervention (p<0.001).                                                                                                                                                                                          | 56                    | 0.45            | mMRC                                                                                                                   | mixed           | visit            | 30 (27-35) days after discharge of the acute COVID-19 phase (baseline) + 9 weeks                                                  |
| Hayden, M. C. [53]      | No  | still-symptomatic patients referred for Pulmonary Rehabilitation after overcoming acute COVID-19 | 105                                            | Germany | three-week Inpatient Pulmonary Rehabilitation Program tailored to each patient's individual needs and with multiple components                                                                                                                                              | At the end of Pulmonary Rehabilitation, we detected improvements with large effect sizes in exertional dyspnoea (NRS), with moderate effect sizes for the mMRC scores, and with small to moderate effect sizes in the intensity of dyspnoea at rest (NRS). | 56                    | 0.55            | 11-point numeric rating scale (NRS) to assess the present severity of dyspnoea sensation at rest and on exertion; mMRC | mixed           | visit            | mean of 69 (0-270) days after discharge from the clinic or acute COVID-19 undergone in an outpatient setting (baseline) + 3 weeks |
| Li, J. [54]             | Yes | formerly hospitalised COVID-19 survivors with remaining dyspnoea complaints                      | 120 (61 allocated to control and 59 to TERECO) | China   | telerehabilitation programme for COVID-19 (TERECO), an unsupervised home-based 6-week exercise programme comprising breathing control and thoracic expansion, aerobic exercise and LMS exercise, delivered via smartphone, and remotely monitored with heart rate telemetry | A treatment effect for mMRC-dyspnoea was found immediately after the intervention period but not at the other time points.                                                                                                                                 | 51                    | 0.45            | mMRC                                                                                                                   | hosp            | visit            | mean (SD) 70 (17) days from hospital discharge (baseline) + 6 weeks (post-treatment) or 28 weeks (follow-up)                      |
| Roozbeh, F. [55]        | Yes | outpatients with mild COVID-19                                                                   | 55 (27 vs 28 control)                          | Iran    | a treatment arm receiving sofosbuvir/daclatasvir plus hydroxychloroquine vs a control arm receiving hydroxychloroquine alone                                                                                                                                                | After one month of follow-up, the number of patients with dyspnoea was significantly lower in the sofosbuvir/daclatasvir group compared with control (p=0.035).                                                                                            | 43                    | 0.47            |                                                                                                                        | non-hosp        | phone            | 30 days from enrolment                                                                                                            |

| First author        | RCT | Population                                | Sample size | Country | Intervention                                                                                                                                                                                                    | Results                                                                                                                | Mean/median age, year | Male proportion | Scale for breathlessness | Hospitalisation | Follow-up method | Follow-up time                                                               |
|---------------------|-----|-------------------------------------------|-------------|---------|-----------------------------------------------------------------------------------------------------------------------------------------------------------------------------------------------------------------|------------------------------------------------------------------------------------------------------------------------|-----------------------|-----------------|--------------------------|-----------------|------------------|------------------------------------------------------------------------------|
| Stavrou, V. T. [56] | No  | previously hospitalised COVID-19 patients | 20          | Greece  | eight weeks unsupervised pulmonary rehabilitation exercise program (3 training sessions per week, 100 min per session)                                                                                          | We observed differences before and after rehabilitation in dyspnoea at the end of 6-minute walking test ( $p=0.005$ ). | 64                    | 0.75            | Borg Scale               | hosp            | visit            | two months after discharge from hospital (baseline) + 8 weeks                |
| Zha, L. [57]        | No  | mild cases of COVID-19                    | 60          | China   | a modified version of rehabilitation exercises retrieved from Chinese martial art Eight-section Brocade and acupuncture, aimed to improve the pulmonary function of patients and ease the expectoration process | The pronounced decline in dyspnoea was recorded over time.                                                             | 54                    | 0.65            |                          | hosp            | -                | at admission, at discharge, 2 weeks after discharge, 4 weeks after discharge |

Note: “-“ refers to information unclear or not applicable. RCT = randomised controlled trial; hosp = hospitalised patients; non-hosp = non-hospitalised patients; mMRC = modified Medical Research Council Dyspnoea Scale; ICU = intensive care unit; ADL = activities of daily living; LMS = lower limb muscle strength.

## Supplementary References.

1. Munn Z, Moola S, Lisy K, et al. Methodological guidance for systematic reviews of observational epidemiological studies reporting prevalence and cumulative incidence data. *Int J Evid Based Healthc* 2015; 13: 147-153.
2. Anaya JM, Rojas M, Salinas ML, et al. Post-COVID syndrome. A case series and comprehensive review. *Autoimmun Rev* 2021; 20: 102947.
3. Arnold DT, Donald C, Lyon M, et al. Krebs von den Lungen 6 (KL-6) as a marker for disease severity and persistent radiological abnormalities following COVID-19 infection at 12 weeks. *PLoS One* 2021; 16: e0249607.
4. Aparisi Á, Ybarra-Falcón C, García-Gómez M, et al. Exercise Ventilatory Inefficiency in Post-COVID-19 Syndrome: Insights from a Prospective Evaluation. *J Clin Med* 2021; 10: 2591.
5. Aydin S, Unver E, Karavas E, et al. Computed tomography at every step: Long coronavirus disease. *Respir Investig* 2021; 59: 622-627.
6. Baldini M, Chiapella MN, Fernández A, et al. Evaluation of the pulmonary function of patients with severe coronavirus 2019 disease three months after diagnosis. *Medicina (B Aires)* 2021; 81: 715-721.
7. Cortés-Telles A, López-Romero S, Figueroa-Hurtado E, et al. Pulmonary function and functional capacity in COVID-19 survivors with persistent dyspnoea. *Respir Physiol Neurobiol* 2021; 288: 103644.
8. D'Cruz RF, Waller MD, Perrin F, et al. Chest radiography is a poor predictor of respiratory symptoms and functional impairment in survivors of severe COVID-19 pneumonia. *ERJ Open Res* 2021; 7: 00655-2020.
9. de Graaf MA, Antoni ML, Ter Kuile MM, et al. Short-term outpatient follow-up of COVID-19 patients: A multidisciplinary approach. *EClinicalMedicine* 2021; 32: 100731.
10. Dreyer N, Petruski-Ivleva N, Albert L, et al. Identification of a Vulnerable Group for Post-Acute Sequelae of SARS-CoV-2 (PASC): People with Autoimmune Diseases Recover More Slowly from COVID-19. *Int J Gen Med* 2021; 14: 3941-3949.
11. Faverio P, Luppi F, Rebora P, et al. Six-Month Pulmonary Impairment after Severe COVID-19: A Prospective, Multicentre Follow-Up Study. *Respiration* 2021; 100: 1078-1087.
12. Fernández-de-Las-Peñas C, Palacios-Ceña D, Gómez-Mayordomo V, et al. Fatigue and Dyspnoea as Main Persistent Post-COVID-19 Symptoms in Previously Hospitalized Patients: Related Functional Limitations and Disability. *Respiration* 2021: 1-10.
13. Fernández-de-Las-Peñas C, Guijarro C, Torres-Macho J, et al. Diabetes and the Risk of Long-Term Post-COVID Symptoms. *Diabetes* 2021; 70: 2917-2921.
14. Fernández-de-Las-Peñas C, Torres-Macho J, Elvira-Martínez CM, et al. Obesity is associated with a greater number of long-term post-COVID symptoms and poor sleep quality: A multicentre case-control study. *Int J Clin Pract* 2021: e14917.
15. Fortini A, Torrigiani A, Sbaragli S, et al. COVID-19: persistence of symptoms and lung alterations after 3-6 months from hospital discharge. *Infection* 2021; 49: 1007-1015.
16. Froidure A, Mahsouli A, Liistro G, et al. Integrative respiratory follow-up of severe COVID-19 reveals common functional and lung imaging sequelae. *Respir Med* 2021; 181: 106383.
17. Gamberini L, Mazzoli CA, Prediletto I, et al. Health-related quality of life profiles, trajectories, persistent symptoms and pulmonary function one year after ICU discharge in invasively ventilated COVID-19 patients, a prospective follow-up study. *Respir Med* 2021; 189: 106665.

18. Garrigues E, Janvier P, Kherabi Y, et al. Post-discharge persistent symptoms and health-related quality of life after hospitalization for COVID-19. *J Infect* 2020; 81: e4-e6.
19. Gautam N, Madathil S, Tahani N, et al. Medium-term outcome of severe to critically ill patients with SARS-CoV-2 infection. *Clin Infect Dis* 2021; ciab341.
20. Horwitz LI, Garry K, Prete AM, et al. Six-Month Outcomes in Patients Hospitalized with Severe COVID-19. *J Gen Intern Med* 2021; 36: 3772-3777.
21. Huang C, Huang L, Wang Y, et al. 6-month consequences of COVID-19 in patients discharged from hospital: a cohort study. *Lancet* 2021; 397: 220-232.
22. Huang L, Yao Q, Gu X, et al. 1-year outcomes in hospital survivors with COVID-19: a longitudinal cohort study. *Lancet* 2021; 398: 747-758.
23. Italia L, Ingallina G, Napolano A, et al. Subclinical myocardial dysfunction in patients recovered from COVID-19. *Echocardiography* 2021; 38: 1778-1786.
24. Lerum TV, Rodriguez JR, Meltzer C, et al. Dyspnoea, lung function and CT findings 3 months after hospital admission for COVID-19. *Eur Respir J* 2021; 57: 2003448.
25. Liang L, Yang B, Jiang N, et al. Three-month Follow-up Study of Survivors of Coronavirus Disease 2019 after Discharge. *J Korean Med Sci* 2020; 35: e418.
26. Lindahl A, Aro M, Reijula J, et al. Women report more symptoms and impaired quality of life: a survey of Finnish COVID-19 survivors. *Infect Dis (Lond)* 2021: 1-10.
27. Mechi A, Al-Khalidi A, Al-Darraji R, et al. Long-term persistent symptoms of COVID-19 infection in patients with diabetes mellitus. *Int J Diabetes Dev Ctries* 2021: 1-4.
28. Meije Y, Duarte-Borges A, Sanz X, et al. Long-term outcomes of patients following hospitalization for coronavirus disease 2019: a prospective observational study. *Clin Microbiol Infect* 2021; 27: 1151-1157.
29. Menges D, Ballouz T, Anagnostopoulos A, et al. Burden of post-COVID-19 syndrome and implications for healthcare service planning: A population-based cohort study. *PLoS One* 2021; 16: e0254523.
30. Milanese M, Anselmo M, Buscaglia S, et al. COVID-19 6 months after hospital discharge: pulmonary function impairment and its heterogeneity. *ERJ Open Res* 2021; 7: 00196-2021.
31. Motiejunaite J, Balagny P, Arnoult F, et al. Hyperventilation as one of the mechanisms of persistent dyspnoea in SARS-CoV-2 survivors. *Eur Respir J* 2021; 58: 2101578.
32. Naik S, Haldar SN, Soneja M, et al. Post COVID-19 sequelae: A prospective observational study from Northern India. *Drug Discov Ther* 2021; 15: 254-260.
33. Qin W, Chen S, Zhang Y, et al. Diffusion Capacity Abnormalities for Carbon Monoxide in Patients with COVID-19 At Three-Month Follow-up. *Eur Respir J* 2021; 58: 2003677.
34. Raman B, Cassar MP, Tunnicliffe EM, et al. Medium-term effects of SARS-CoV-2 infection on multiple vital organs, exercise capacity, cognition, quality of life and mental health, post-hospital discharge. *EClinicalMedicine* 2021; 31: 100683.
35. Riou M, Marco TC, Oulehri W, et al. Respiratory follow-up after hospitalization for COVID-19: Who and when? *Eur J Clin Invest* 2021; 51: e13603.
36. Seeßle J, Waterboer T, Hippchen T, et al. Persistent symptoms in adult patients one year after COVID-19: a prospective cohort study. *Clin Infect Dis* 2021; ciab611.
37. Shah AS, Ryu MH, Hague CJ, et al. Changes in pulmonary function and patient-reported outcomes during COVID-19 recovery: a longitudinal, prospective cohort study. *ERJ Open Res* 2021; 7: 00243-2021.
38. Shang YF, Liu T, Yu JN, et al. Half-year follow-up of patients recovering from severe COVID-19: Analysis of symptoms and their risk factors. *J Intern Med* 2021; 290: 444-450.

39. Sigfrid L, Drake TM, Pauley E, et al. Long Covid in adults discharged from UK hospitals after Covid-19: A prospective, multicentre cohort study using the ISARIC WHO Clinical Characterisation Protocol. *Lancet Reg Health Eur* 2021; 8: 100186.
40. Skjorten I, Ankerstjerne OAW, Trebinjac D, et al. Cardiopulmonary exercise capacity and limitations 3 months after COVID-19 hospitalisation. *Eur Respir J* 2021; 58: 2100996.
41. Sonnweber T, Sahanic S, Pizzini A, et al. Cardiopulmonary recovery after COVID-19: an observational prospective multicentre trial. *Eur Respir J* 2021; 57: 2003481.
42. Szekely Y, Lichter Y, Sadon S, et al. Cardiorespiratory Abnormalities in Patients Recovering from Coronavirus Disease 2019. *J Am Soc Echocardiogr* 2021; 34: 1273-1284.
43. Vijayakumar B, Tonkin J, Devaraj A, et al. CT Lung Abnormalities after COVID-19 at 3 Months and 1 Year after Hospital Discharge. *Radiology* 2021; 211746.
44. Wu X, Liu X, Zhou Y, et al. 3-month, 6-month, 9-month, and 12-month respiratory outcomes in patients following COVID-19-related hospitalisation: a prospective study. *Lancet Respir Med* 2021; 9: 747-754.
45. Yin X, Xi X, Min X, et al. Long-term chest CT follow-up in COVID-19 Survivors: 102-361 days after onset. *Ann Transl Med* 2021; 9: 1231.
46. Yomogida K, Zhu S, Rubino F, et al Post-Acute Sequelae of SARS-CoV-2 Infection Among Adults Aged  $\geq 18$  Years - Long Beach, California, April 1-December 10, 2020. *MMWR Morb Mortal Wkly Rep* 2021; 70: 1274-1277.
47. Zhang X, Wang F, Shen Y, et al. Symptoms and Health Outcomes Among Survivors of COVID-19 Infection 1 Year After Discharge From Hospitals in Wuhan, China. *JAMA Netw Open* 2021; 4: e2127403.
48. Ahmed I, Inam AB, Khalil W, et al. Effectiveness of aerobic exercise training program on cardio-respiratory fitness and quality of life in patients recovered from COVID-19. *Eur J Physiother* 2021; 1-6.
49. Bouteleux B, Henrot P, Ernst R, et al. Respiratory rehabilitation for Covid-19 related persistent dyspnoea: A one-year experience. *Respir Med* 2021; 189: 106648.
50. Cesarone MR, Hu S, Belcaro G, et al. Pycnogenol®-Centellicum® supplementation improves lung fibrosis and Post-Covid-19 lung healing. *Minerva Med* 2021; 112: 1-6.
51. Curci C, Negrini F, Ferrillo M, et al. Functional outcome after inpatient rehabilitation in postintensive care unit COVID-19 patients: findings and clinical implications from a real-practice retrospective study. *Eur J Phys Rehabil Med* 2021; 57: 443-450.
52. Dalbosco-Salas M, Torres-Castro R, Rojas Leyton A, et al. Effectiveness of a Primary Care Telerehabilitation Program for Post-COVID-19 Patients: A Feasibility Study. *J Clin Med* 2021; 10: 4428.
53. Hayden MC, Limbach M, Schuler M, et al. Effectiveness of a Three-Week Inpatient Pulmonary Rehabilitation Program for Patients after COVID-19: A Prospective Observational Study. *Int J Environ Res Public Health* 2021; 18: 9001.
54. Li J, Xia W, Zhan C, et al. A telerehabilitation programme in post-discharge COVID-19 patients (TERECO): a randomised controlled trial. *Thorax* 2021; 1-10.
55. Roozbeh F, Saeeedi M, Alizadeh-Navaei R, et al. Sofosbuvir and daclatasvir for the treatment of COVID-19 outpatients: a double-blind, randomized controlled trial. *J Antimicrob Chemother* 2021; 76: 753-757.
56. Stavrou VT, Tourlakopoulos KN, Vavougiou GD, et al. Eight Weeks Unsupervised Pulmonary Rehabilitation in Previously Hospitalized of SARS-CoV-2 Infection. *J Pers Med* 2021; 11: 806.
57. Zha L, Xu X, Wang D, et al. Modified rehabilitation exercises for mild cases of COVID-19. *Ann Palliat Med* 2020; 9: 3100-3106.
